# Supplementary material
Source: Springer Nature journal article supplement (https://www.springermedizin.de/resource/supplementary/12883_2012_710_MOESM4_ESM.pdf/9456150)

**A**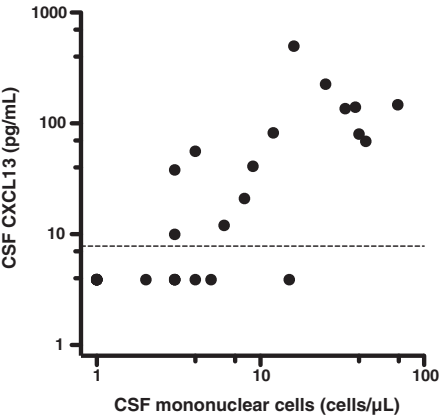**B**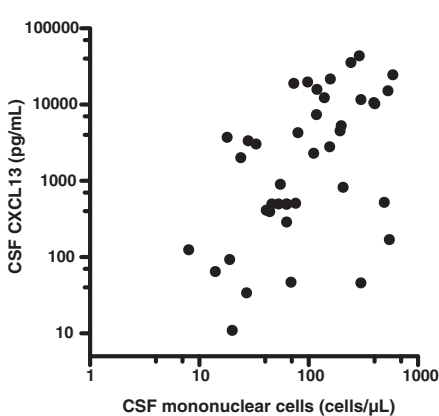

Supplement: MOESM4 [file 9456150]
